# Supplementary material
Source: PubMed Central journal article supplement (PMC6518876)
Supplement: 2018_202952-Disclosures_and_Contributions.pdf [file 2018_202952-Disclosures_and_Contributions.pdf]

Haematologica  
HAEMATOL/2018/202952  
Version 4

Detection and characterization of homozygosity of mutated  
<I>CALR</I> by copy neutral loss of heterozygosity in  
myeloproliferative neoplasms among cases with high <I>CALR</I>  
mutation loads or with progressive disease

Anna Stengel, Sabine Jeromin, Torsten Haferlach, Manja  
Meggendorfer, Wolfgang Kern, and Claudia Haferlach

Disclosures: C.H., W.K. and T.H. declare part ownership of Munich Leukemia Laboratory (MLL). A.S., S.J. and M.M. are employed by the MLL Munich Leukemia Laboratory.

Contributions: AS and SJ designed the study, AS and SJ interpreted the data, AS wrote the manuscript. AS and CH were responsible for chromosome banding and FISH analyses, MM and SJ for molecular analyses, WK for immunophenotyping and TH for cytomorphologic analyses. All authors read and contributed to the final version of the manuscript.
